# Supplementary material
Source: PubMed Central journal article supplement (PMC10193254)
Supplement: NIHMS1875199-supplement-Appendix_B.pdf [file NIHMS1875199-supplement-Appendix_B.pdf]

## Electronic Supplementary Material

# Melatonin and probiotics ameliorate nanoplastics-induced hematopoietic injury by modulating the gut microbiota-metabolism

Lei Zhang<sup>1,§</sup>, Jiaru Jing<sup>1,§</sup>, Lin Han<sup>1</sup>, Ziyang Liu<sup>1</sup>, Jingyu Wang<sup>1</sup>, Wei Zhang<sup>1</sup>, and Ai Gao<sup>1,2</sup> (✉)

<sup>1</sup> Department of Occupational Health and Environmental Health, School of Public Health, Capital Medical University, Beijing 100069, China

<sup>2</sup> Beijing Key Laboratory of Environmental Toxicology, Capital Medical University, Beijing 100069, China

<sup>§</sup> Lei Zhang and Jiaru Jing contributed equally to this work.

Supporting information to <https://doi.org/10.1007/s12274-022-5032-9>

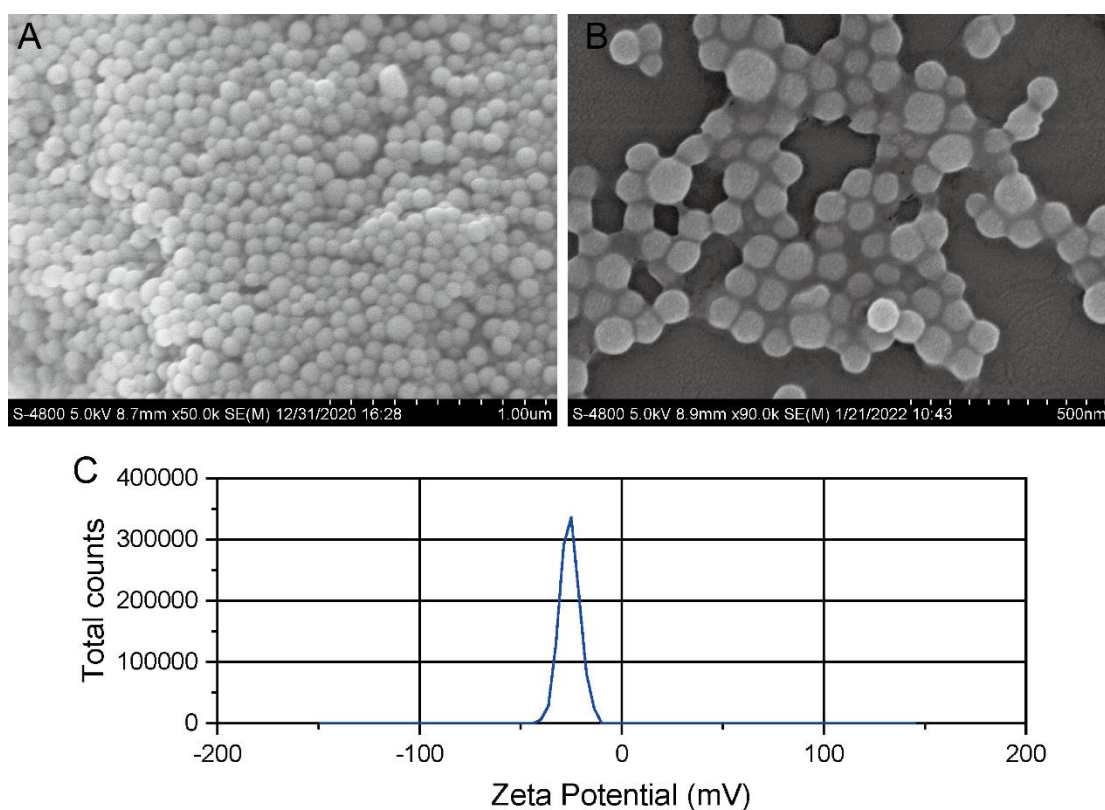

**Figure S1** Characterization of 80 nm PS-NP. (A) A representative scanning electron microscopy (SEM) image of PS-NP. (B) A representative transmission electron microscope (TEM) image of PS-NP. (C) The zeta potentials of the PS-NP in pure water.

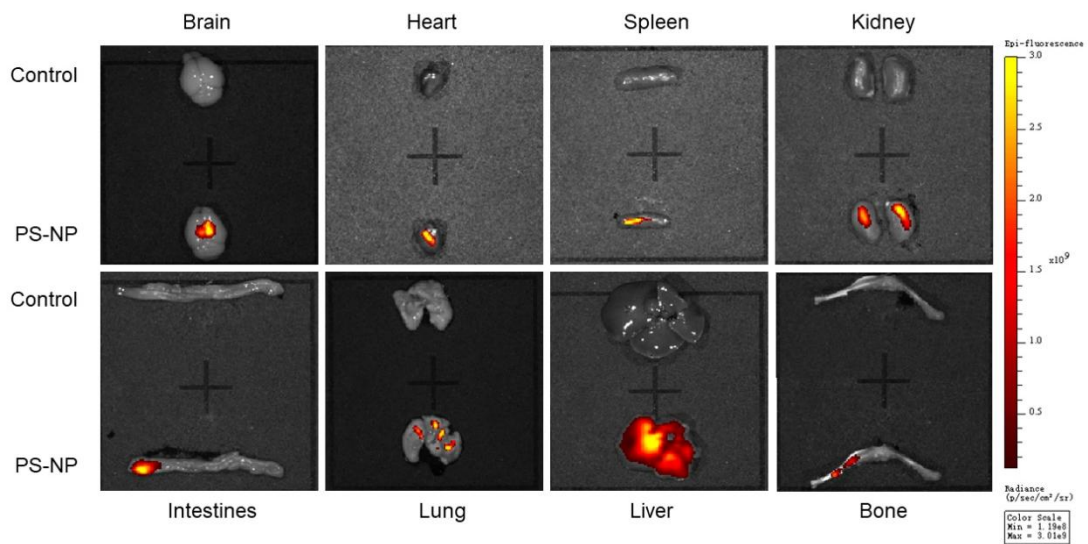

**Figure S2** Distribution of NP in multiple tissues (brain, heart, spleen, kidney, intestines, lung, liver, and bone) of mice after 2 weeks of exposure was characterized by *ex vivo* fluorescence imaging.

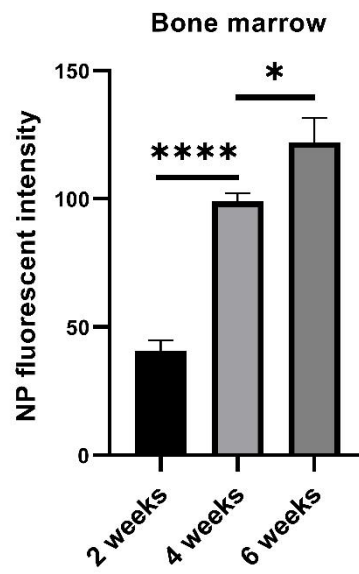

**Figure S3** Fluorescence intensity in bone marrow at 2, 4, and 6 weeks of NP exposure ( $n = 3$ /group).
